# Supplementary material
Source: PubMed Central journal article supplement (PMC6105898)
Supplement: zii999092527s1.pdf [file zii999092527s1.pdf]

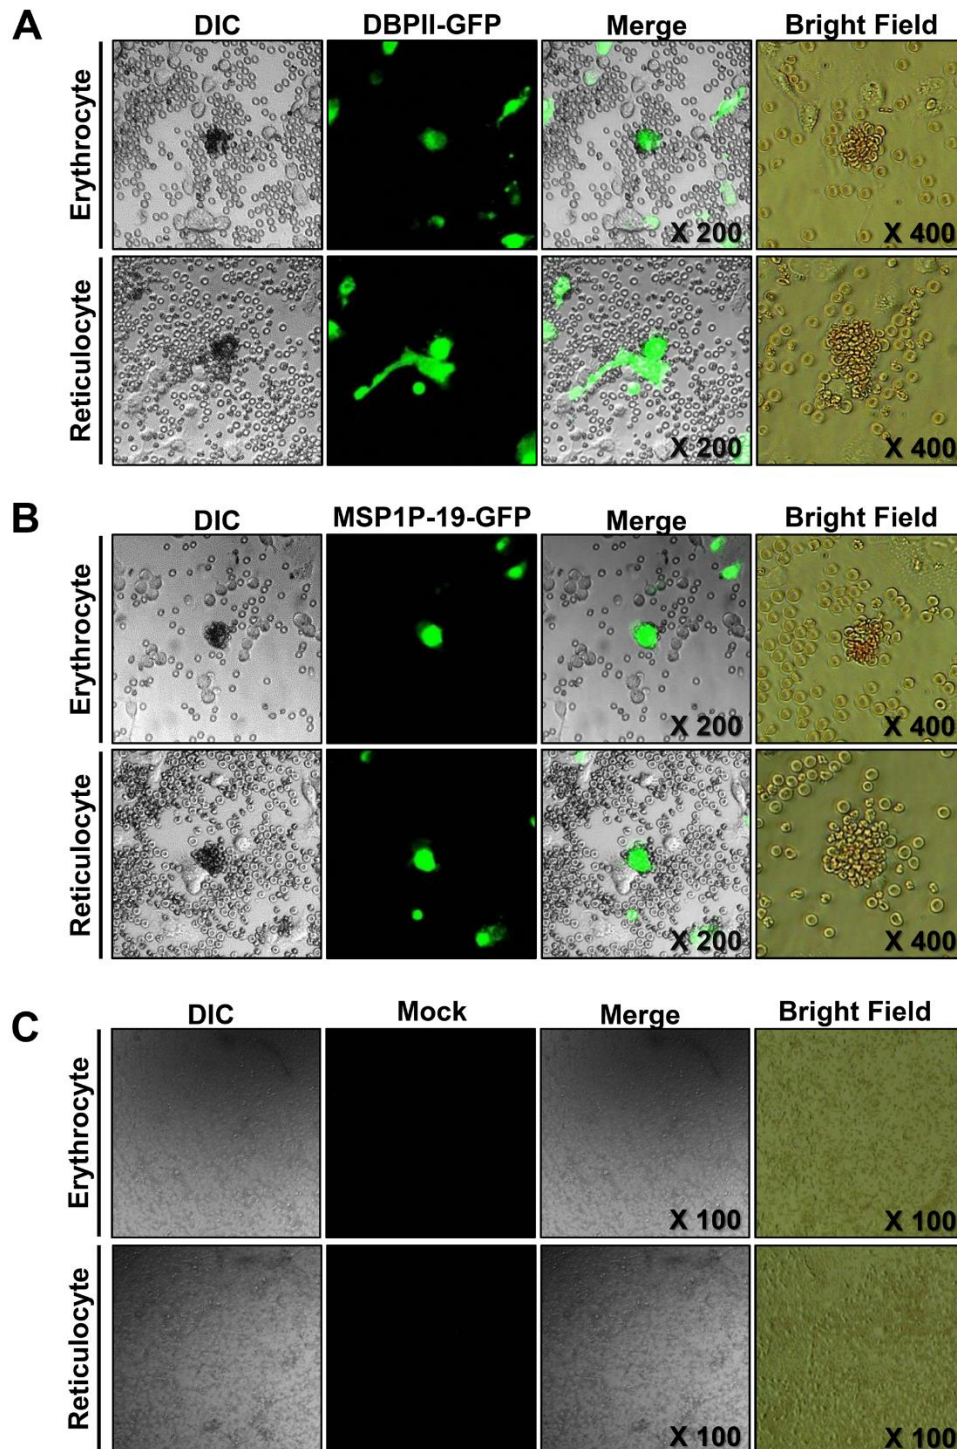

**Fig. S1. Binding of PvDBPII and PvMSP1P-19 fragment expressed on COS-7 cells to reticulocyte and erythrocyte.** (A) PvDBPII and (B) PvMSP1P-19 transfection efficiency was calculated by counting green fluorescence (GFP) positive cells using confocal microscopy and bright filed shows typical rosette formation under the light microscopy. The erythrocyte fraction (reticulocyte count > 0.5%) and reticulocyte fraction (reticulocyte count >80%) were used for control study. (C) Mock control used for non-specific binding confirmation for erythrocyte and reticulocyte fraction on 100x magnifier.

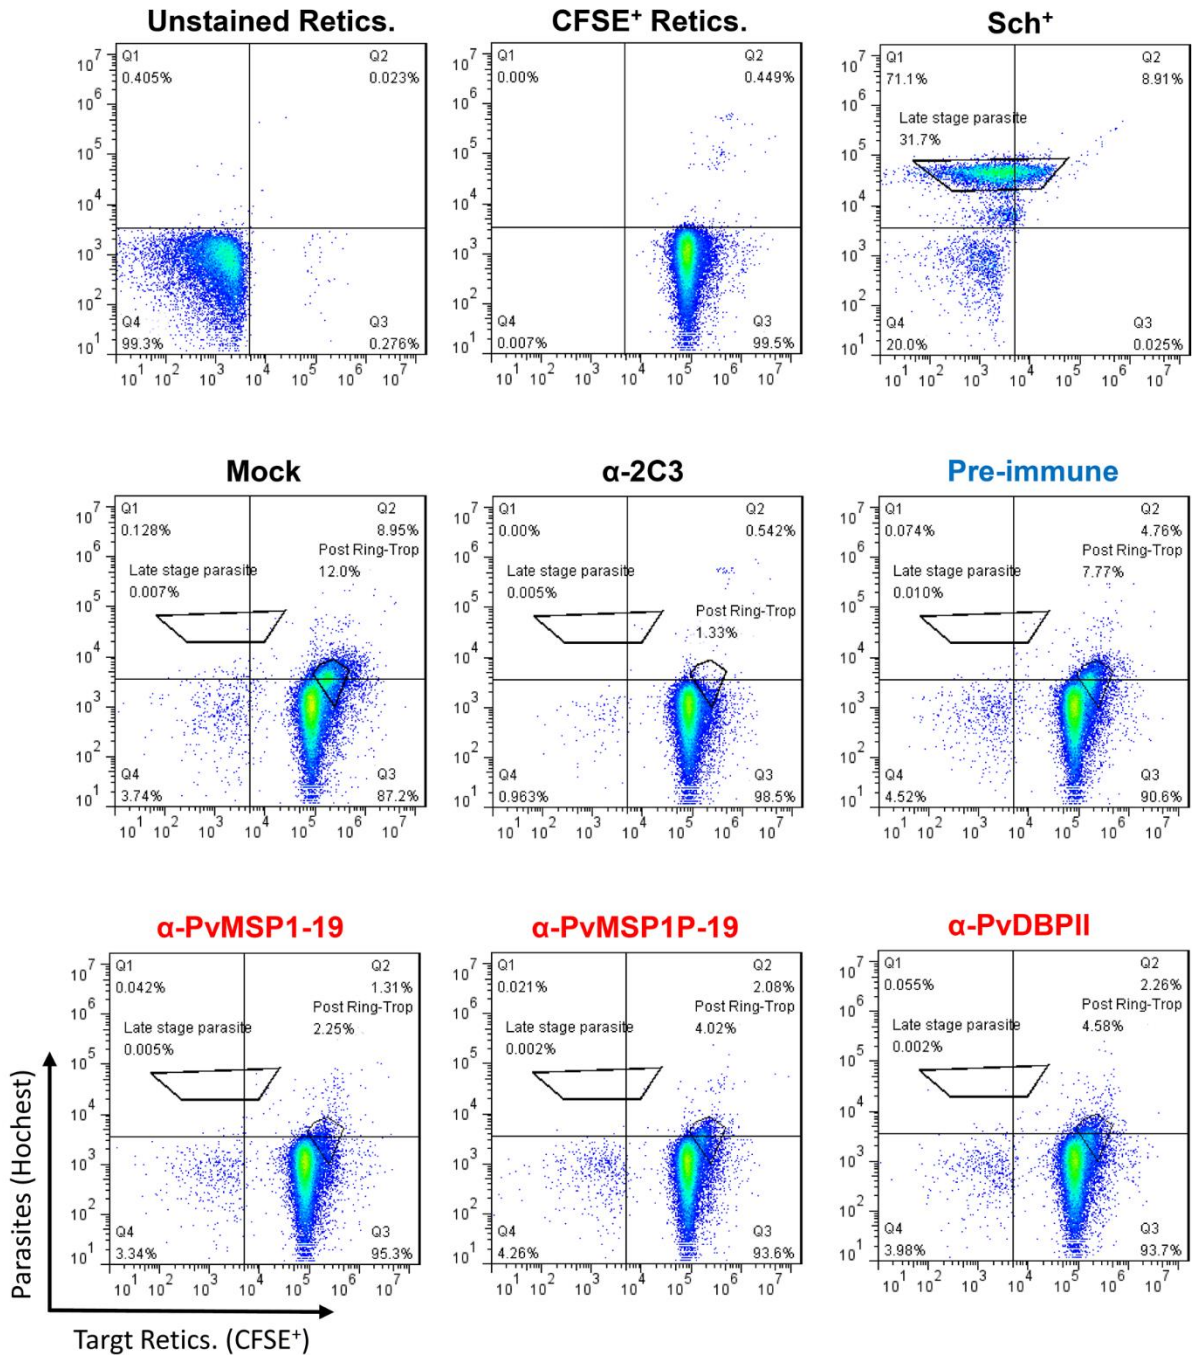

**Fig. S2. The gating strategy of *P. vivax* invasion inhibition assay.** Before invasion parasitemia shown late stage parasites gate in schizont enrichment panel (Sch<sup>+</sup>) and after post-invasion parasite shown post ring-trop. gate.

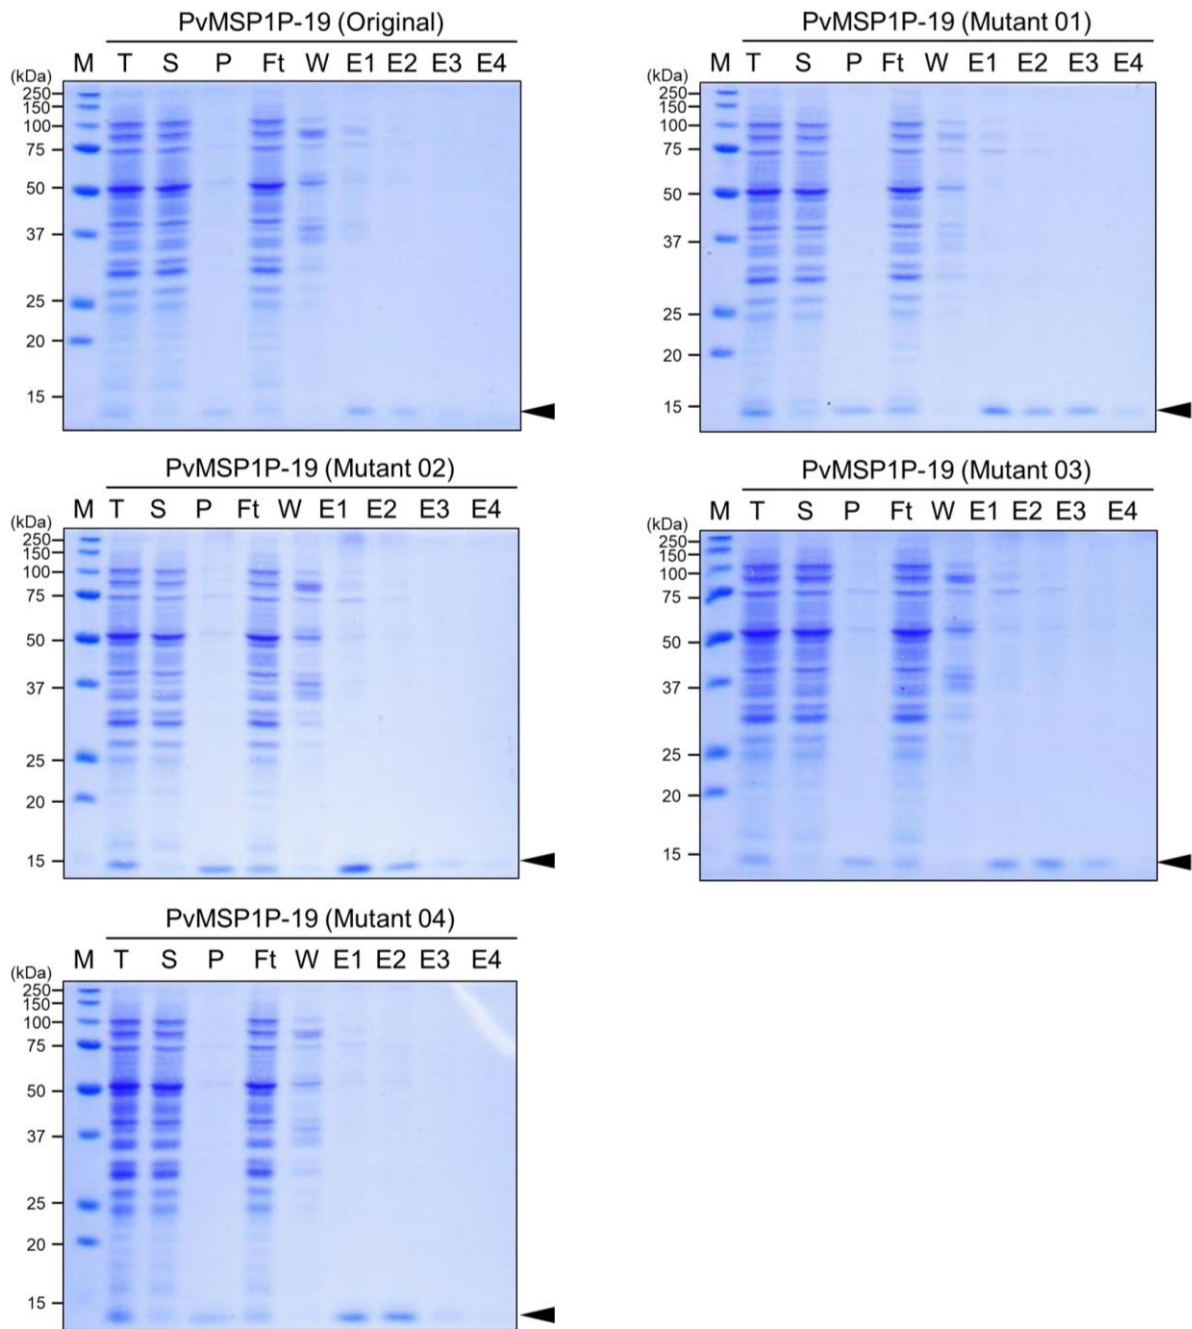

**Fig. S3. PvMSP1P-19 and mutant protein expression.** Recombinant protein expressed by WGCf and purified by Ni-NTA. The arrowhead indicates the specific bands for the purified PvMSP1P-19 and recombinant mutant proteins. T, total translation mix; S, supernatant; P, pellet; Ft, flow-through; W, wash fraction; E, elution.

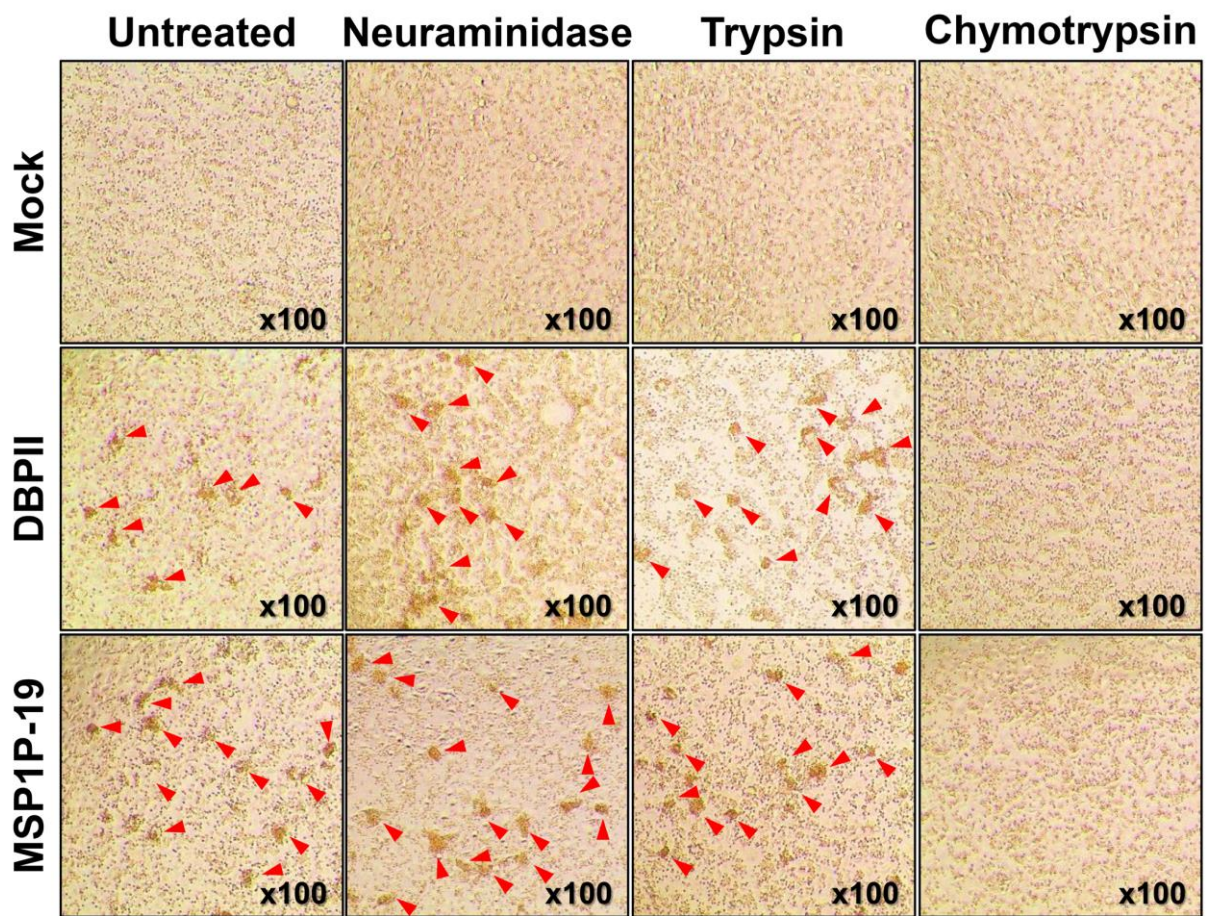

**Fig. S4. PvMSP1P-19 and PvDBPII enzyme-treated reticulocyte specificity.** The rosette formation shows on PvMSP1P-19 and PvDBPII expressed COS-7 cells with neuraminidase, trypsin treatment reticulocyte. Mock control and chymotrypsin treatment reticulocyte was not found rosette formation. The red arrow head indicates rosette formation under the light microscopy on 100x magnifier.

**Table S1. PvMSP1P-19 peptide information**

| <b>Peptide Name</b> | <b>Peptide Sequence</b> | <b>Peptide position</b> | <b>Length (aa.)</b> |
|---------------------|-------------------------|-------------------------|---------------------|
| A1746               | AAADRVEKNCRNRKCPLN      | 1746-1763               | 18                  |
| C1755               | CRNRKCPLNSFCFIQTIN      | 1755-1722               | 18                  |
| S1764               | SFCFIQTINEECLLLNY       | 1764-1781               | 18                  |
| E1773               | EECLLLNYSMVGEKCIL       | 1773-1790               | 18                  |
| S1782               | SMVGEKCILNEQNSCAVK      | 1782-1799               | 18                  |
| N1791               | NEQNSCAVKNGGCDLKAT      | 1791-1808               | 18                  |
| N1800               | NGGCDLKATCELKKNRVN      | 1800-1817               | 18                  |
| C1809               | CELKKNRVNCICPKGTKP      | 1809-1826               | 18                  |
| C1818               | CICPKGTKPMHEGVVCSF      | 1818-1835               | 18                  |

aa., amino acid

**Table S2.** Primer sequences for recombinant PvMSP1P protein expression

| <b>Fragment code</b> | <b>Forward primer<br/>(5'→3')</b> | <b>Reverse primer<br/>(5'→3')</b> | <b>Position<br/>(aa.)</b> | <b>Length<br/>(aa.)</b> | <b>MW<br/>(kDa)</b> | <b>pI</b> | <b>Features/<br/>Structures</b> |
|----------------------|-----------------------------------|-----------------------------------|---------------------------|-------------------------|---------------------|-----------|---------------------------------|
| PvMSP1p-19 (O)       | GACCGTGTGGAAAAGAAGACTGC           | GCTGCACACGACCCCCTC                | 1,749-1,834               | 86                      | 9.6                 | 8.1       | EGF-like domain                 |
| PvMSP1p-19 (M1)      | AAGCGTGTGAgAAGAAGACTGC            | GCTGCACACGACCCCCTC                | 1,749-1,834               | 86                      | 9.6                 | 8.1       | EGF-like mutant 01              |
| PvMSP1p-19 (M2)      | GACCGTGTGGAAAAGAAGACTGC           | GCTGCACACGACCCCCTC                | 1,749-1,834               | 86                      | 9.6                 | 8.1       | EGF-like mutant 02              |
| PvMSP1p-19 (M3)      | GACCGTGTGGAAAAGAAGACTGC           | GCTGCACACGACCCCCTC                | 1,749-1,834               | 86                      | 9.7                 | 8.1       | EGF-like mutant 03              |
| PvMSP1p-19 (M4)      | GACCGTGTGAAAAAGAAGACTGC           | GCTGCACACGACCCCCTC                | 1,749-1,834               | 86                      | 9.5                 | 8.1       | EGF-like mutant 04              |

aa., amino acid; MW, molecular weight; kDa, kilodalton; pI, isoelectric point.
